# Supplementary material for: Ring opening of epoxidized methyl oleate using a novel acid-functionalized iron nanoparticle catalyst
Source: Royal Society of Chemistry journal article supplement (doi:10.1039/c1gc16043e), 2011-10-31
Supplement: c1gc16043e_2.pdf [file c1gc16043e_2.pdf]

## Supporting information

# Greener ring opening of epoxidized methyl oleate using novel acid functionalized iron nanoparticle catalyst

*B. Kollbe Ahn<sup>1</sup>, Hongwang Wang<sup>2</sup>, Shona Robinson<sup>3</sup>, Tej B. Shrestha<sup>4</sup>, Deryl L. Troyer<sup>4</sup>, Stefan Bossmann<sup>2</sup>, Xiuzhi Susan Sun<sup>1\*</sup>*

<sup>1</sup>Bio-Materials & Technology Lab, Department of Grain Science & Industry, Kansas State University, Manhattan, KS 66506, USA

<sup>2</sup>Department of Chemistry, Kansas State University, Manhattan, KS, 66506, USA

<sup>3</sup>Department of Chemistry, University of Toronto, ON M5S 3H6, Canada

<sup>4</sup>Anatomy & Physiology, Manhattan, KS, 66506, USA

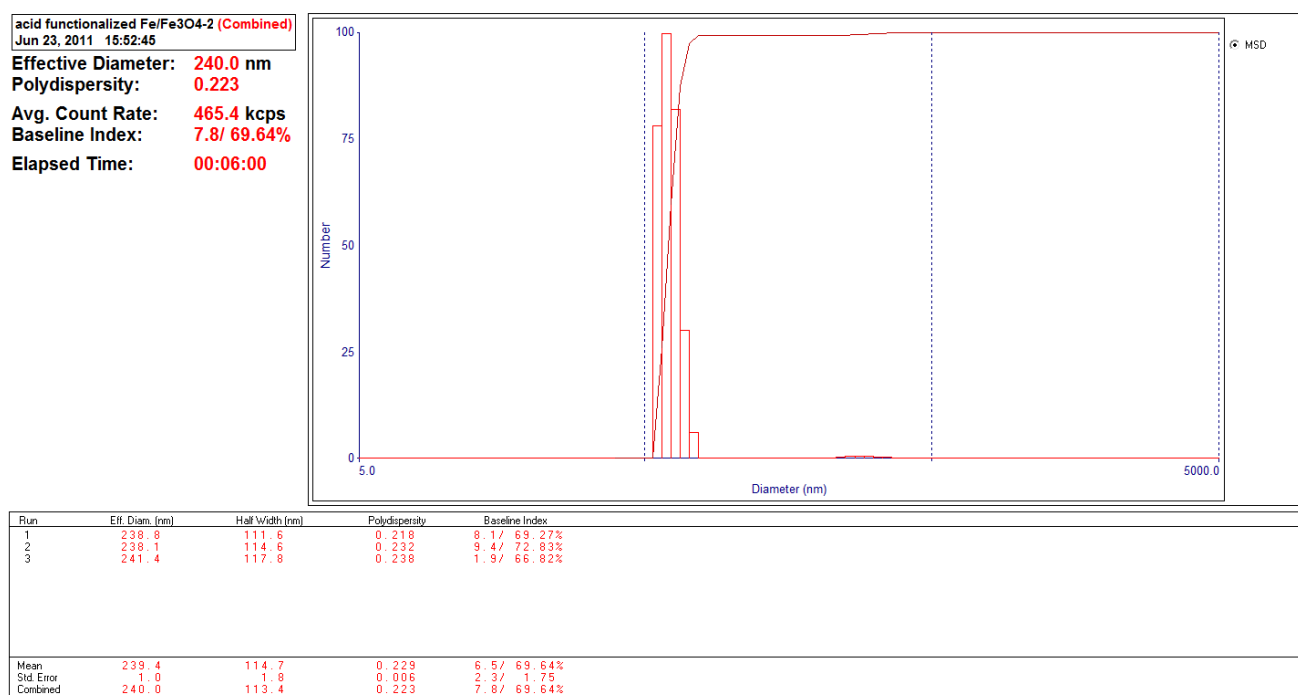

**Figure S1.** Dynamic Light Scattering measurement of the sulfamic acid functionalized core/shell Fe/Fe<sub>3</sub>O<sub>4</sub> nanoparticles

\* Tel: 785-532-4077, Fax: 785-532-7193, E-mail: xss@ksu.edu

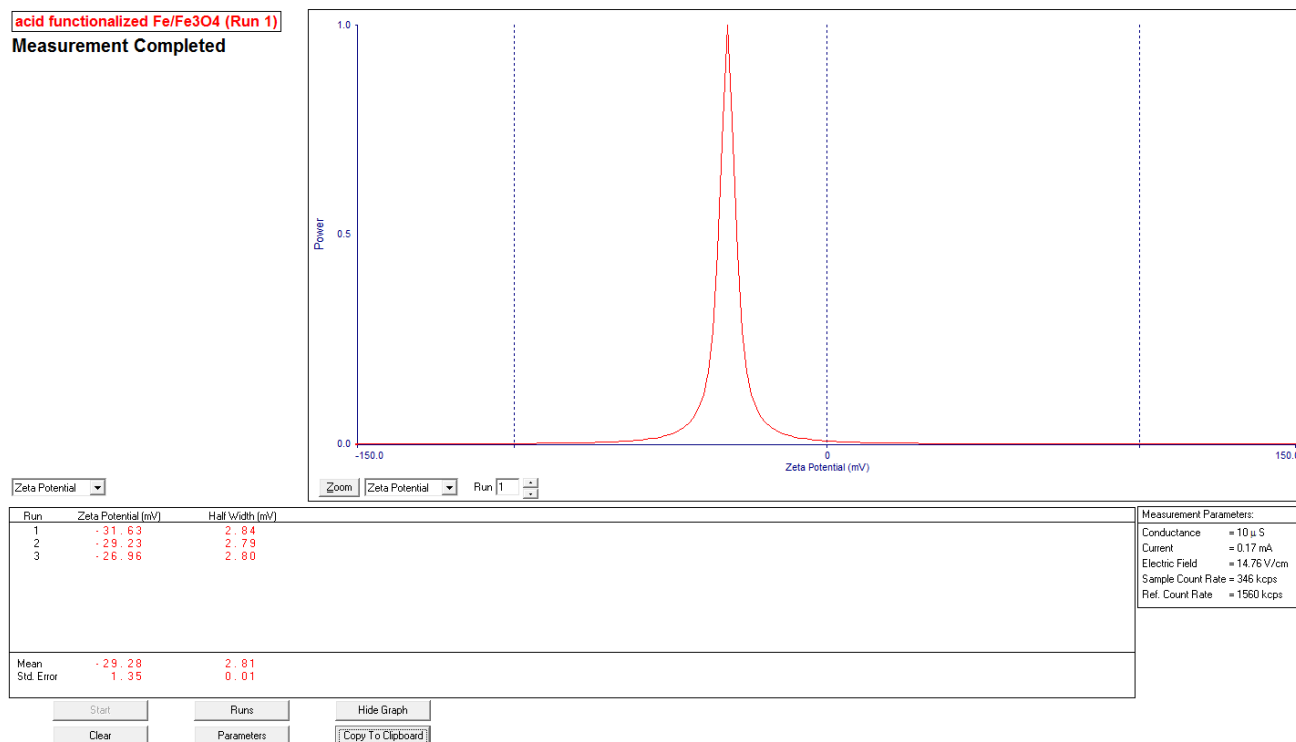

**Figure S2.** Zeta potential of the sulfamic acid functionalized core/shell Fe/Fe<sub>3</sub>O<sub>4</sub> nanoparticles

whw-BI-gcosy.fid.esp

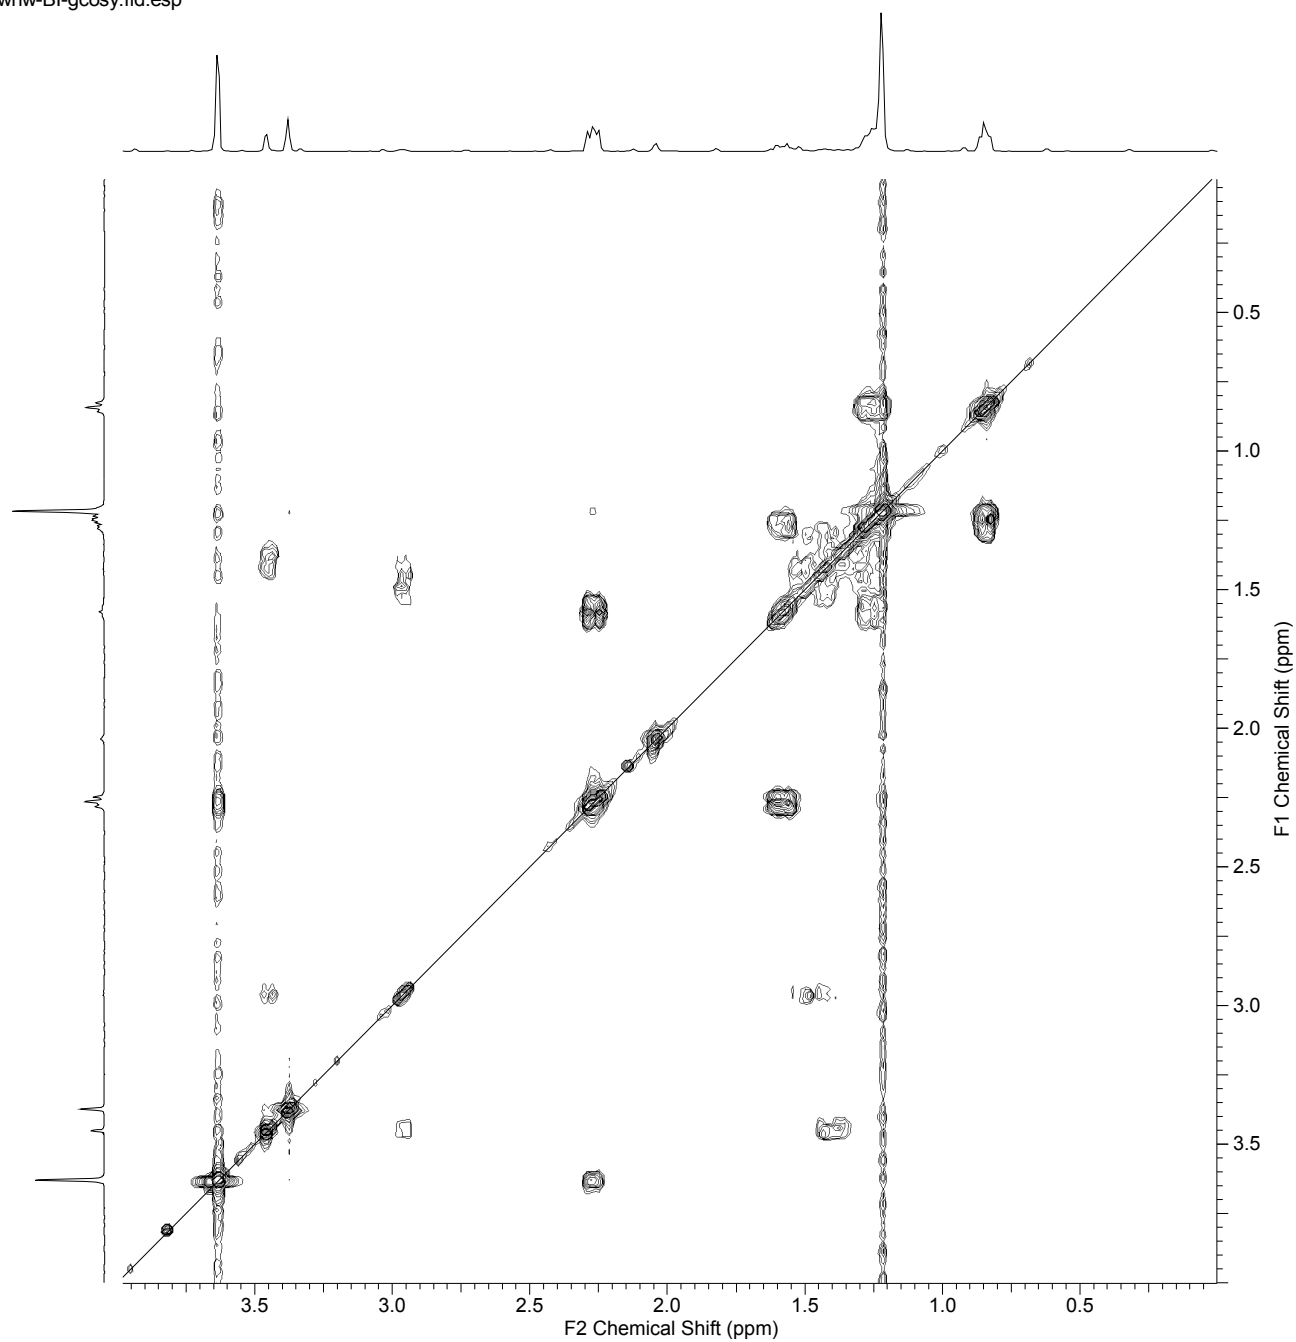

**Figure S3.**  $^1\text{H}$ - $^1\text{H}$  COSY NMR of  $\alpha$ -methoxy-hydroxylation of EMO by the sulfamic acid-functionalized Fe/Fe<sub>3</sub>O<sub>4</sub> NPs

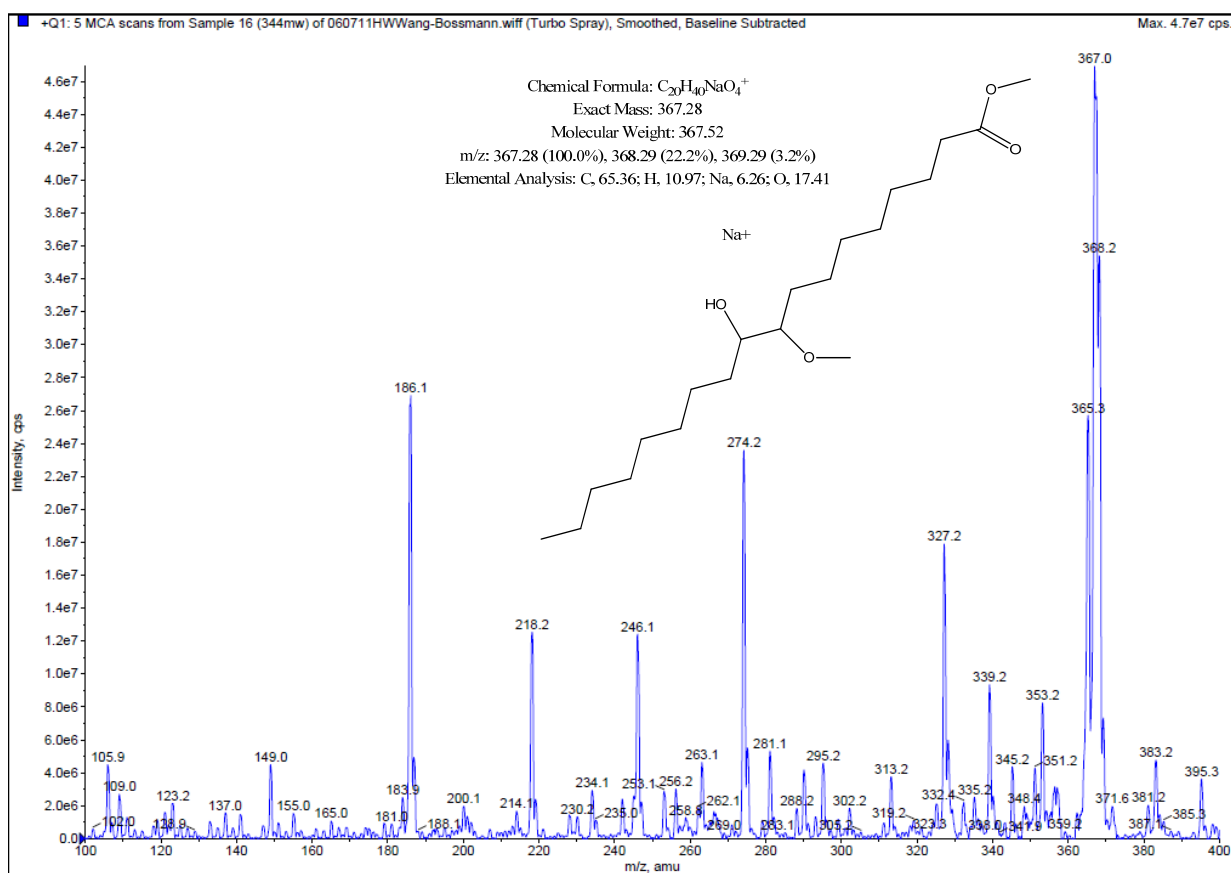

**Figure S4.** ESI-MS of  $\alpha$ -methoxy-hydroxylation of EMO by the sulfamic acid-functionalized Fe/Fe<sub>3</sub>O<sub>4</sub> NPs

# Synthetic Routes

Four routes for the following ring-opening of epoxidized methyl oleate (EMO) were compared on a 1 kg scale. A ketone byproduct seen in two of the routes studied is shown in brackets.

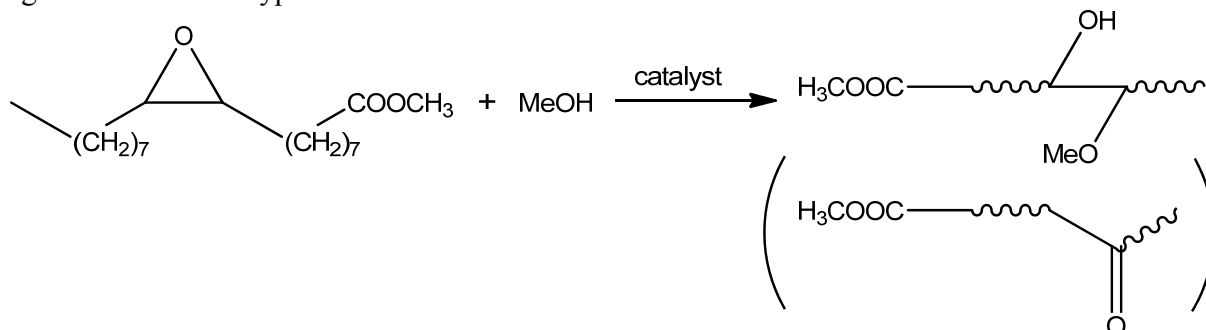

## 1) Iron Nanoparticle Method

### Materials:

EMO 0.907 kg (2.90 mol)  
sulfonated iron nanoparticles 90 g  
MeOH 0.930 kg (29.0 mol)

### Procedure:

Stir for 30 min at 40 °C. Remove remaining MeOH via distillation. Yield: 100%

### Products/Residuals:

Ring-opened EMO 1.00 kg (product)  
Sulfonated iron nanoparticles 90 g (100% recycled)  
MeOH 0.837 kg (recycled)

## 2) Sulfuric Acid Method

### Materials:

EMO 0.907 kg (2.90 mol)  
H<sub>2</sub>SO<sub>4</sub> 90 g  
MeOH 0.930 kg (29.0 mol)

### Procedure:

Stir for 30 min at room temperature. Remove remaining MeOH via distillation. Yield: 100%

### Products/Residuals:

Ring-opened EMO 1.00 kg (product)  
H<sub>2</sub>SO<sub>4</sub> 90 g (not recycled)  
MeOH 0.837 kg (recycled)

## 3) SAC13 Resin Method

### Materials:

EMO 1.09 kg (3.50 mol)

SAC 13 (commercial recyclable heterogeneous sulfonic acid functionalized resin) 90 g  
MeOH 1.12 kg (35.0 mol)

**Procedure:**

Stir for 60 min at 60 °C. Remove remaining MeOH via distillation. Yield: 83%

**Products/Residuals:**

Ring-opened EMO 1.00 kg (product)  
SAC 13 90 g (recycled, cleanup not considered in LCA)  
MeOH 1.03 kg (recycled)  
Ketone byproduct 0.19 kg (0.59 mol)

4) Amberlyst-15 Resin Method

**Materials:**

EMO 1.04 kg (3.34 mol)  
Amberlyst-15 (commercial recyclable heterogeneous sulfonic acid functionalized resin) 0.020g  
MeOH 1.07 kg (33.4 mol)  
Ketone byproduct 0.14 kg (0.43 mol)

**Procedure:**

Stir for 100 min at 60 °C. Remove remaining MeOH via distillation. Yield: 87%

**Products/Residuals:**

Ring-opened EMO 1 kg (product)  
Amberlyst-15 90 g (recycled, cleanup not considered in LCA)  
MeOH 0.98 kg (recycled)

**Impact assessment method**

The reaction impact assessment for epoxide ring opening was carried out using a procedure based on the ISO life-cycle assessment method<sup>1,2</sup>. This approach includes both the amount of waste as well as the harmfulness of the waste. Our procedure was adapted from Mercer and coworkers' exercise in impact assessment "Choosing the Greenest Synthesis"<sup>3</sup>. We compare four reactions with respect to 9 environmental risks. For most of these risks, the chemical outputs are compared to reference chemicals; this allows addition of all contributors to the risk for comparison within a synthetic route as well as between routes. In our assessment, we built a multimedia compartmental model (MCM) to assess the partitioning behavior of each chemical into four environmental compartments (air, water, soil & sediment). This was implemented in assessing the human toxicity risk of each procedure.

**Assumptions for Impact Assessment**

- We assume 100% recovery of all recyclable catalysts (NPs, SAC13, Amberlyst-15); in reality recovery of NPs would likely be less involved than recovery of the resins, due to the innovative use of a magnet.
- We assume 100% environmental loss of H<sub>2</sub>SO<sub>4</sub> in method 2, as it cannot be reused.
- We assume each reaction cools and is worked up prior to solvent distillation.
- We assume 0.1% environmental loss of MeOH in all procedures, which would likely occur during distillation.
- We assume 0.1% environmental loss of ketone byproduct<sup>4</sup> (where yields are less than 100%). The remaining byproduct material is incinerated. Although the literature suggests oligomeric byproducts occur in addition to the ketone byproduct, these have similar reactivity but are more complex to characterize. Despite this simplification, commentary on alternate byproducts appears throughout this assessment.

- All four routes were scaled in a linear fashion (i.e. material quantities and yields) to produce 1 kg or product for even comparison.
- Because all four routes produce the same mass of product, the environmental impact of the product itself was ignored.

## The Nine Factors

### 1) Acidification Potential

As none of the four processes involve the use or production of gases, their contribution to acid rain is not significant. All acidification potential indices ( $I_{AP}$ ) were, therefore, zero.

### 2) Ozone Depletion Potential

As none of the four processes involve the use of halogenated solvents or materials, they do not contribute to stratospheric ozone depletion. All ozone depletion potential indices ( $I_{OD}$ ) were, therefore, zero.

### 3) Smog Formation Potential

Methanol escape from all four processes was considered for smog formation potential. Although byproduct in processes 3 and 4 could participate in smog formation, it is non-volatile. A smog formation potential ( $SFP_i$ ) was determined by comparing methanol's maximum incremental reactivity ( $MIR_i$ ) to that of a standard mixture of reference organic gases ( $MIR_{ROG}$ ). The  $SFP_i$  is expressed as the mass (kg) ozone formed per mass (kg) of chemical released. Ozone is used as the reference compound as it is a significant participant in photochemical smog.

A smog formation potential index  $I_{SF}$  (in equivalent kg of ozone) was calculated for each process, based on the contribution from methanol released into the environment. Had other species contributed, they would have been included here.

$$I_{SF} = \sum_i SFP_i \cdot m_i = SFP_{MeOH} \cdot m_{MeOH} = 0.16 \cdot m_{MeOH}$$

|                      | Route                 |                       |                       |                       |
|----------------------|-----------------------|-----------------------|-----------------------|-----------------------|
|                      | 1                     | 2                     | 3                     | 4                     |
| $SFP_{MeOH}$         | 0.16                  | 0.16                  | 0.16                  | 0.16                  |
| $m_{MeOH}$ (kg MeOH) | $9.30 \times 10^{-4}$ | $9.30 \times 10^{-4}$ | $1.12 \times 10^{-3}$ | $1.07 \times 10^{-3}$ |
| $I_{SF}$ (kg ozone)  | $1.49 \times 10^{-4}$ | $1.49 \times 10^{-4}$ | $1.79 \times 10^{-4}$ | $1.71 \times 10^{-4}$ |

$SFP$  for methanol was taken from Guinée *et al.*<sup>1</sup>.

### 4) Global Warming Potential

The contribution of each process to global warming potential included three components: firstly, the global warming potential of escaped volatiles (in all cases MeOH) over time compared with an equal mass of atmospheric  $CO_2$ ; secondly, the amount of  $CO_2$  produced to create the energy used in heating and distillation; thirdly, the  $CO_2$  produced by incineration of the organic byproduct.

Global warming potential of escaped MeOH, based on a 100-year time horizon was calculated in a similar manner to the smog formation potential.

$$I_{GWP} = \sum_i GWP_i \cdot m_i = GWP_{MeOH} \cdot m_{MeOH} = 2.8 \cdot m_{MeOH}$$

CO<sub>2</sub> emissions from heating were calculated assuming heating from room temperature (20°C) to reaction temperature or distillation temperature. C<sub>p,i</sub> represents the gravimetric heat capacity of species i, while q is the heat required to increase i's temperature by the stated difference. As no gravimetric heat capacity was available for EMO, it was estimated based on that of *cis*-9-octadecenoic acid (C<sub>18</sub>H<sub>34</sub>O<sub>2</sub>) of 2.043 J/g/K. This assumption is reasonable for heating, as molecular composition and mass is similar. A sample calculation is given for methanol in route 1:

$$q_i = m_i \cdot C_{p,i} \cdot (T_{rxn} - T_{ambient})$$

$$q_{MeOH} = 0.930 \text{ kg} \cdot 2.531 \text{ kJ/kg/K} \cdot (40 - 20) \text{ K} = 47.1 \text{ kJ}$$

Distillation of methanol was calculated in a similar manner to the above, with the addition of the heat required for distillation ( $\Delta H_{vap}$ ). Again, a sample calculation for route 1:

$$q_i = [m_i \cdot C_{p,i} \cdot (T_{boiling} - T_{ambient})] + [m_i \cdot \Delta H_{vap,i}]$$

$$q_{MeOH} = [0.837 \text{ kg} \cdot 2.531 \text{ kJ/kg/K} \cdot (65 - 20) \text{ K}] + [0.837 \text{ kg} \cdot 1213 \text{ kJ/kg}] = 1190 \text{ kJ}$$

The heat required to perform the reaction and heat required to distill methanol were combined ( $q_{tot}$ ) so the equivalent mass of CO<sub>2</sub> from heating could be determined. For every kilojoule of heat required,  $4.2 \cdot 10^{-5}$  kg CO<sub>2</sub> is produced.

$$m_{CO_2} = q_{tot} \cdot 4.2 \cdot 10^{-5} \text{ kg/kJ}$$

Finally, the CO<sub>2</sub> released by combustion of the ketone byproduct of reactions 3 and 4 was calculated. NC designates the number of carbons in each molecule, because each carbon atom would form one CO<sub>2</sub> equivalent after ideal combustion. As we saw previously, this is later multiplied by the mass of byproduct burned after each reaction.

$$GWP_i = \frac{NC_i/MW_i}{NC_{CO_2}/MW_{CO_2}} = \frac{18/312.49}{1/44.01} = 2.54$$

The global warming potentials from all three calculations were added to determine the total GWP index for each route.

|                                                                 | Route                 |                       |                       |                       |
|-----------------------------------------------------------------|-----------------------|-----------------------|-----------------------|-----------------------|
|                                                                 | 1                     | 2                     | 3                     | 4                     |
| MeOH release (kg CO <sub>2</sub> )                              | $2.60 \times 10^{-3}$ | $2.60 \times 10^{-3}$ | $3.14 \times 10^{-3}$ | $2.99 \times 10^{-3}$ |
| Energy requirements for heating (kg CO <sub>2</sub> )           | $5.02 \times 10^{-2}$ | $4.66 \times 10^{-2}$ | $6.58 \times 10^{-2}$ | $6.25 \times 10^{-2}$ |
| CO <sub>2</sub> from byproduct combustion (kg CO <sub>2</sub> ) | 0                     | 0                     | $4.71 \times 10^{-4}$ | $3.44 \times 10^{-4}$ |
| Total I <sub>GWP</sub> (kg CO <sub>2</sub> )                    | $5.28 \times 10^{-2}$ | $4.92 \times 10^{-2}$ | $6.94 \times 10^{-2}$ | $6.58 \times 10^{-2}$ |

GWP for methanol was taken from Forster *et al.*<sup>5</sup>. Heat capacities were taken from the CRC Handbook<sup>6</sup>. CO<sub>2</sub> to kJ conversion was based on the estimate of Stageland *et al.*<sup>7</sup>.



### 5) Human Toxicity Potential (inhalation)

For assessment of inhalation and ingestion toxicity the MCM was used, based on parameters set out by Mercer et al. Environmental compartments were assigned representative properties, as follows:

| Compartment | Volume, V (m <sup>3</sup> ) | Density, d (t/m <sup>3</sup> ) | Fraction organic material, $\phi$ |
|-------------|-----------------------------|--------------------------------|-----------------------------------|
| Air         | 1.0×10 <sup>10</sup>        | N/A                            | N/A                               |
| Water       | 7.0×10 <sup>6</sup>         | N/A                            | N/A                               |
| Soil        | 9.0×10 <sup>3</sup>         | 1.5                            | 0.02                              |
| Sediment    | 2.0×10 <sup>4</sup>         | 1.5                            | 0.04                              |

Equilibrium partitioning was assumed between the environmental compartments, according to the octanol-water partition coefficient ( $K_{ow}$ ), organic carbon partition coefficient ( $K_{oc}$ ), and Henry's law constant, H.

| Chemical         | $K_{ow}$              | $K_{oc}$              | H (atm·m <sup>3</sup> ·mol <sup>-1</sup> ) |
|------------------|-----------------------|-----------------------|--------------------------------------------|
| methanol         | 0.204                 | 8.37×10 <sup>-2</sup> | 4.49×10 <sup>-6</sup>                      |
| ketone byproduct | 1.05×10 <sup>8</sup>  | 4.29×10 <sup>7</sup>  | 1.99×10 <sup>-5</sup>                      |
| sulfuric acid    | 2.45×10 <sup>-6</sup> | 1.01×10 <sup>-6</sup> | 1.0×10 <sup>-19</sup>                      |
| toluene          | 501                   | 205                   | 0.0067                                     |

Above,  $K_{oc}$  has been calculated from  $K_{ow}$  using the formula:

$$K_{oc} = 0.41 \cdot K_{ow}$$

An arbitrary mass of each chemical emitted was compared to an equal mass of toluene, yielding these relative concentrations:

| Chemical         | Air ( $C_i/C_{tol}$ )  | Water ( $C_i/C_{tol}$ ) | Soil ( $C_i/C_{tol}$ ) | Sediment ( $C_i/C_{tol}$ ) |
|------------------|------------------------|-------------------------|------------------------|----------------------------|
| methanol         | 5.99×10 <sup>-1</sup>  | 8.94×10 <sup>-2</sup>   | 3.64×10 <sup>-1</sup>  | 3.64×10 <sup>-1</sup>      |
| ketone byproduct | 3.81×10 <sup>-5</sup>  | 1.28×10 <sup>-2</sup>   | 2.68×10 <sup>3</sup>   | 2.68×10 <sup>3</sup>       |
| sulfuric acid    | 5.50×10 <sup>-15</sup> | 3.68×10 <sup>-2</sup>   | 1.80×10 <sup>-6</sup>  | 1.80×10 <sup>-6</sup>      |
| (toluene)        | 1.00                   | 1.00                    | 1.00                   | 1.00                       |

LC50's used in this model were as shown below. Unfortunately, no estimate was available for the ketone byproduct, so a very conservative estimate (100 ppm) was chosen. This worst case scenario was shown to have minimal effect on the overall INHTP for the reaction because the mass emitted is very low, and the percentage in the atmosphere is almost negligible. 4h LC50 values were used where available. The sulfuric acid LC50 is a 2h value but, based on the very low resultant INHTP, we assume that the 4h LC50 would result in a similarly negligible INHTP.

| Chemical         | LC50 (ppm) |
|------------------|------------|
| methanol         | 64000      |
| ketone byproduct | (100)      |
| sulfuric acid    | 510        |
| toluene          | 5400       |

By combining relative LC50's with relative concentrations in the air, the inhalation toxicity potential (INHTP) was found for each chemical, relative to an equal mass of toluene, by this equation:

$$INHTP = \frac{C_i(\text{air})}{C_{\text{tol}}(\text{air})} \times \frac{LC50_{\text{tol}}}{LC50_i}$$

| Chemical         | INHTP                 |
|------------------|-----------------------|
| methanol         | $5.05 \times 10^{-2}$ |
| ketone byproduct | $2.06 \times 10^{-3}$ |
| sulfuric acid    | $5.8 \times 10^{-14}$ |
| (toluene)        | 1.00                  |

For all routes, the toxicity risk via inhalation was relatively low, as a result of non-volatile and relatively low-toxicity species. Methanol was volatile but its inhalation toxicity was low compared to the reference chemical, toluene. Sulfuric acid was insufficiently volatile to contribute to inhalation toxicity potential. Unfortunately, LC50 data was unavailable for the ketone byproduct; however, with a conservative assumption on toxicity of 1000 ppm, the low volatility and low emissions are sufficient to prevent this from posing an inhalation toxicity concern.

MCM parameters were suggested by Mercer and Jessop<sup>3</sup>. All  $K_{ow}$  values were calculated using Advanced Chemistry Development (ACD/Labs) Software V11.02 (© 1994-2011 ACD/Labs), by SciFinder. Methanol H was taken from Meylan and Howard<sup>8</sup>. Ketone byproduct H was estimated in ChemDraw, as per Mercer and Jessop's suggested procedure<sup>3</sup>. Toluene H was taken from Shiu and Ma<sup>9</sup>. Methanol LC50 was taken from the Sigma Aldrich MSDS for methanol<sup>10</sup>. Toluene LC50 was taken from Urrea-Bulla<sup>11</sup>. Sulfuric Acid LC50 was taken from the Sigma Aldrich MSDS for sulfuric acid<sup>10</sup>.

#### 6) Human Toxicity Potential (ingestion)

As with inhalation toxicity, ingestion toxicity was assessed with the use of our MCM. LD50's used in this model were as shown below:

| Chemical         | LD50 (mg/kg) |
|------------------|--------------|
| methanol         | 5628         |
| ketone byproduct | 3000         |
| sulfuric acid    | 2140         |
| toluene          | 5580         |

By combining relative LD50's with relative concentrations in the water (see section 5), the ingestion toxicity potential (INGTP) was found for each chemical, relative to an equal mass of toluene, by this equation:

$$INGTP = \frac{C_i(\text{water})}{C_{\text{tol}}(\text{water})} \times \frac{LD50_{\text{tol}}}{LD50_i}$$

| Chemical         | INGTP                 |
|------------------|-----------------------|
| methanol         | 886                   |
| ketone byproduct | $2.39 \times 10^{-2}$ |
| sulfuric acid    | 961                   |
| (toluene)        | 1.00                  |

The sulfuric acid partitioning into water caused dramatic ingestion toxicity associated with route 2. In routes 3 and 4, the ketone byproduct caused very slight toxicity compared with methanol emissions. This results from the hydrophobic byproduct's affinity for soil and sediment compartments. Although the LD50 for the ketone byproduct is unknown, it was approximated using a shorter-chain ketone/methyl ester: methyl 3-oxobutanoate. This approximation is not ideal, due to lower bioaccumulation of the smaller species; however, since ingestion toxicity is estimated on a mass basis, the lower molecular weight would compensate for this difference to some extent.

Methanol LD50 was taken from Larionov, relying on SciFinder's translation from Russian<sup>12</sup>. Sulfuric acid LD50 was the Sigma Aldrich MSDS for sulfuric acid<sup>10</sup>. Toluene LD50 was taken from Isayev<sup>13</sup>. Methyl 3-oxobutanoate LD50 was taken from Smyth<sup>14</sup>.

#### 7) Persistence

Methanol's atmospheric half-life was calculated based on Kwok and Atkinson's method at 298K. First the rate of H abstraction is calculated (increased by the electron donating hydroxyl group). Then the half-life is calculated based on an assumed OH radical concentration of  $10^6 \text{ molec cm}^{-3}$

$$k_{H \text{ abstraction}} = k_{\text{prim}} \cdot F(X) = k_{\text{prim}} \cdot F(OH) = 1.36 \cdot 10^{-12} \text{ cm}^2 \text{ molec}^{-1} \text{ s}^{-1} * 3.5 \\ = 4.77 \cdot 10^{-12} \text{ cm}^2 \text{ molec}^{-1} \text{ s}^{-1}$$

$$t_{1/2} = \frac{1}{4.77 \cdot 10^{-12} \text{ cm}^2 \text{ molec}^{-1} \text{ s}^{-1} * 10^6 \text{ molec cm}^{-3}} = 2.1 \cdot 10^6 \text{ s} = 24 \text{ days}$$

As the ketone byproduct was much less volatile than methanol, its half-life was estimated via a Boethling index. With respect to aerobic biodegradation, the lifetime was estimated as follows, where  $a_n$  and  $f_n$  refer to constants associated with various functional groups and the number of such groups. The Boethling index of 2.9 indicates a lifetime on the order of weeks.

$$\text{Boethling index}(BI) = 3.199 - (0.00221 \cdot MW) + \sum a_n \cdot f_n$$

$$BI_{\text{byproduct}} = 3.199 - (0.00221 \cdot 312.49) + 0.298(\text{alkyl}) - 0.023(\text{ketone}) + 0.140(\text{ester}) = 2.9$$

Methanol atmospheric lifetime was estimated using the Kwok and Atkinson method<sup>15</sup>. The ketone byproduct lifetime was estimated using Boethling's index method<sup>16</sup>.

#### 8) Bioaccumulation

In all syntheses the only species which would bioaccumulate appreciably is the ketone byproduct from reactions 3 and 4. Methanol is soluble in water, and its estimated bioconcentration factor is 1, therefore bioaccumulation does not occur. There is no data available for the ketone byproduct, but methyl oleate provides a reasonable model. Methyl oleate has an estimated bioconcentration factor of  $7.3 \cdot 10^5$ , and an estimated log P of 8.02, indicating very high bioaccumulation potential. This very hydrophobic nature is due to the large size, long alkyl chains and low polarity of the molecule. Sulfuric acid would not be expected to bioaccumulate.

Bioaccumulation potential was calculated using Advanced Chemistry Development (ACD/Labs) Software V11.02 (© 1994-2011 ACD/Labs), as referenced by SciFinder.

## 9) Abiotic Resource Depletion Potential

As procedures 1, 3 and 4 do not use rare elements, their depletion of abiotic resources was negligible. These resource depletion indices ( $I_{ADP}$ ) were, therefore, zero. Sulfur (S) in  $H_2SO_4$  (route 3) has a low abiotic resource depletion potential, compared with antimony (Sb), the reference element.

$$ADP_i = \frac{(\text{depletion rate})_i / (\text{reserves})_i}{(\text{depletion rate})_{Sb} / (\text{reserves})_{Sb}} = 3.6 \cdot 10^{-4}$$

The abiotic depletion potential index  $I_{ADP}$  was calculated based on the mass of sulfur used, as sulfur constitutes 32.7% of the mass of  $H_2SO_4$ . The abiotic resource depletion potential index for route 2 is expressed in equivalent grams of antimony.

$$I_{ADP} = \sum_i ADP_i \cdot m_i = ADP_S \cdot m_S = (3.6 \cdot 10^{-4}) \cdot (3.2 \cdot 10^{-2} g) = 1.09 \cdot 10^{-5} g$$

1. *Handbook on Life Cycle Assessment*, Kluwer Academic Publishers, Norwell, MA, 2002.
2. D. T. Allen and S. D.R., *Green Engineering: Environmentally Conscious Design of Chemical Processes*, Prentice Hall, 2001.
3. Personal conversation with S. Mercer and P. G. Jessop at Queens University.
4. L. A. Rios, P. P. Weckes, H. Schuster and W. F. Hoelderich, *Applied Catalysis A: General*, 2005, **284**, 155-161.
5. P. Forster and V. Ramaswamy, Cambridge, 2007.
6. in *CRC Handbook of Chemistry and Physics*, ed. D. R. Lide, 2007.
7. A. Stageland, P. Frisvold and F. Hauge, 2008.
8. W. M. Meylan and P. H. Howard, *Environmental Toxicology and Chemistry*, 1991, **10**, 1283-1293.
9. W.-Y. Shiu and K.-C. Ma, *Journal of Physical and Chemical Reference Data*, 2000, **29**, 41.
10. [www.sigmaaldrich.com](http://www.sigmaaldrich.com).
11. A. Urrea-Bulla, M. M. Suarez and B. Moreno-Murillo, *Fitoterapia*, 2004, **75**, 392.
12. A. G. Larionov, *Gigiena Truda i Professional'nye Zabolevaniya*, 1975, **11**, 27-30.
13. O. Isayev, B. Rasulev, L. Gorb and J. Leszczynski, *Molecular Diversity*, 2006, **10**, 233-245.
14. H. F. Smyth, *Journal of Industrial Hygiene and Toxicology* 1948, **30**, 63-68.
15. E. S. C. Kwok and R. Atkinson, *Atmospheric Environment*, 1995, **29**, 1685-1695.
16. R. S. Boethling, P. H. Howard, W. Meylan, W. Stiteler, J. Beauman and N. Tirado, *Environmental Science & Technology*, 1994, **28**, 459-465.
